# Supplementary material for: Stretchable and stable neuromorphic tactile system
Source: Royal Society of Chemistry journal article supplement (doi:10.1039/d4tc01144a), 2024-01-01
Supplement: d4tc01144a1.pdf [file d4tc01144a1.pdf]

## Supporting information

### Stretchable and stable neuromorphic tactile system

Yaqian Liu<sup>a,c,d</sup>, Hui Wang<sup>b</sup>, Jiaming Lin<sup>b</sup>, Weixi Ye<sup>b</sup>, Zhichao Rao<sup>b</sup>, Wenjie Lu<sup>b</sup>,  
Bingle Huang,<sup>\*e,f</sup> and Huipeng Chen<sup>\*b</sup>

<sup>a</sup> School of Electronics and Information, Zhengzhou University of Light Industry,  
Zhengzhou, Henan 450002, China;

<sup>b</sup> Institute of Optoelectronic Display, Fuzhou University, Fuzhou 350002, China;

<sup>c</sup> Academy for Quantum Science and Technology, Zhengzhou University of Light  
Industry, Zhengzhou 450001, China;

<sup>d</sup> Henan Key Laboratory of Magnetoelectric Information Functional Materials,  
Zhengzhou, Henan 450002, China;

<sup>e</sup>School of Information and Intelligent Transportation, Fujian Chuanzheng Communic  
ations College, Fuzhou 350007, China

<sup>f</sup>Research Institute of Intelligent Transportation ,

Fujian Chuanzheng Communications College, Fuzhou 350007, China

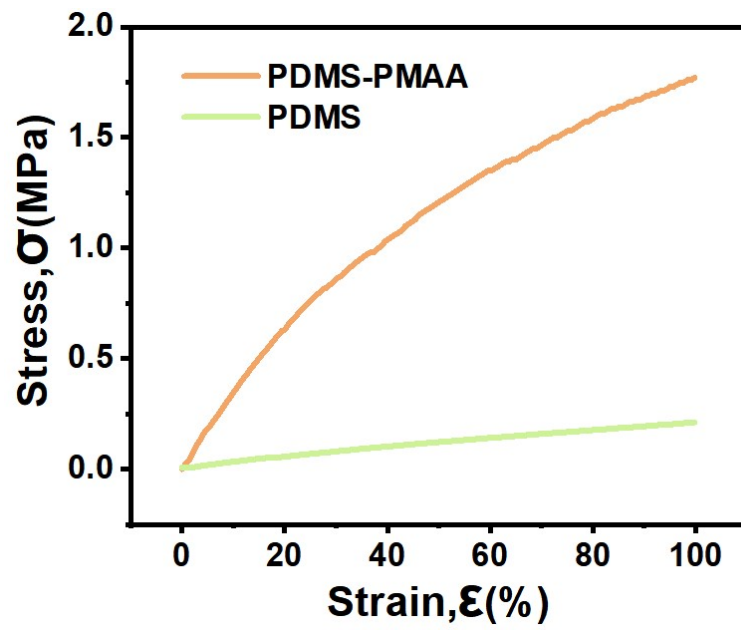

**Figure S1.** Comparison of stress-strain curves of PDMS-PMAA and PDMS.

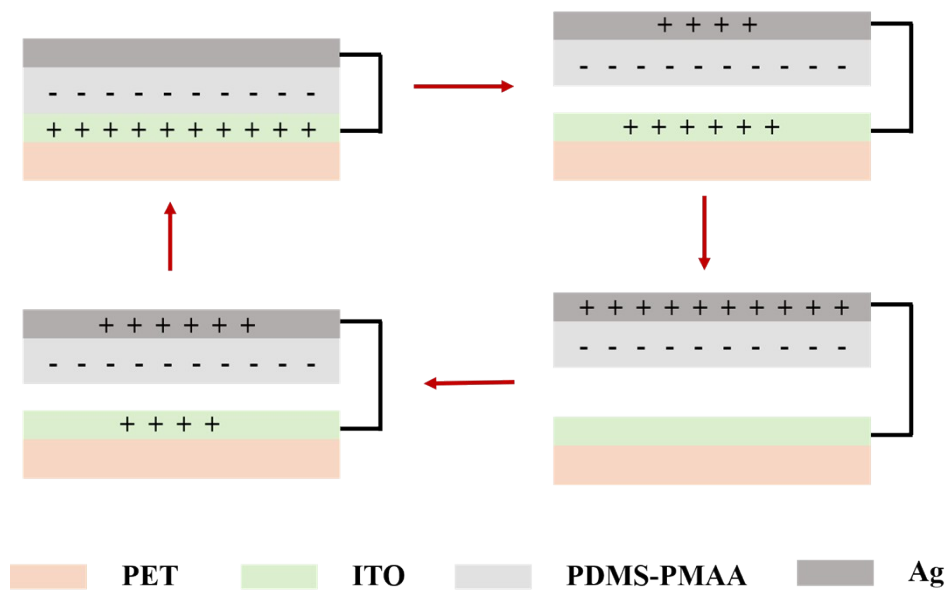

**Figure S2.** Working mechanism of TENG.

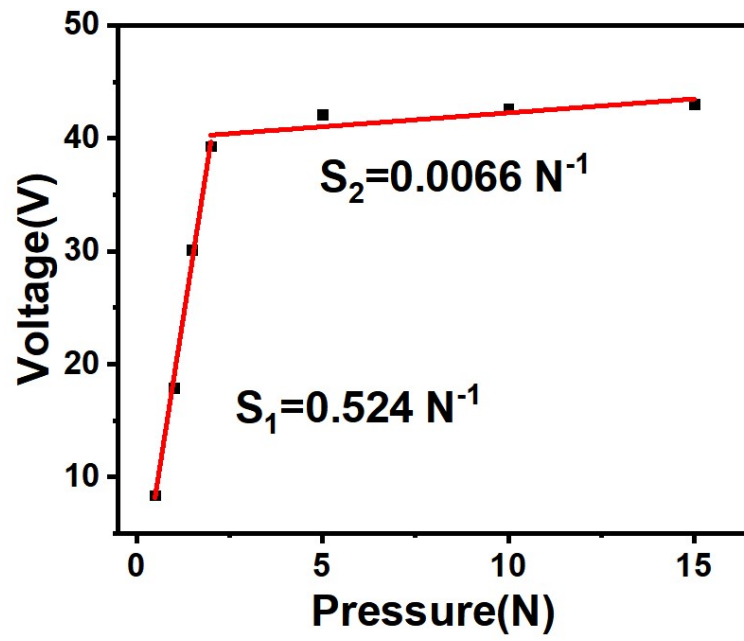

Figure S3. The pressure sensitivity of TENG.

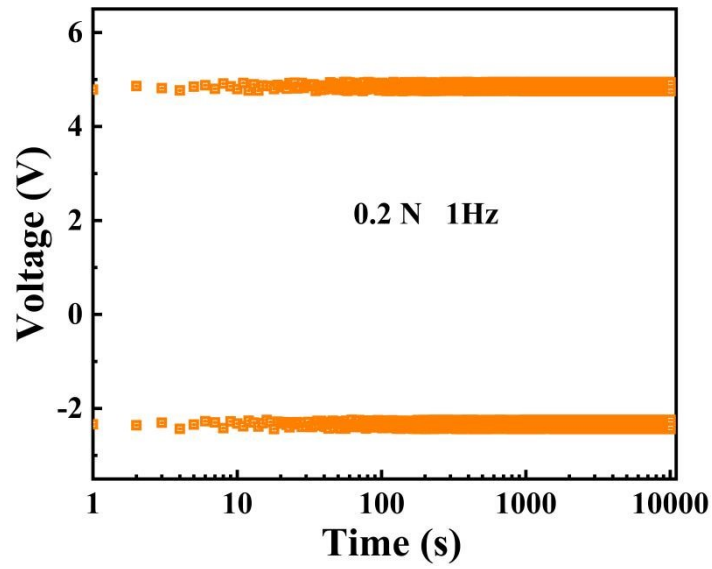

Figure S4. The stability of TENG.

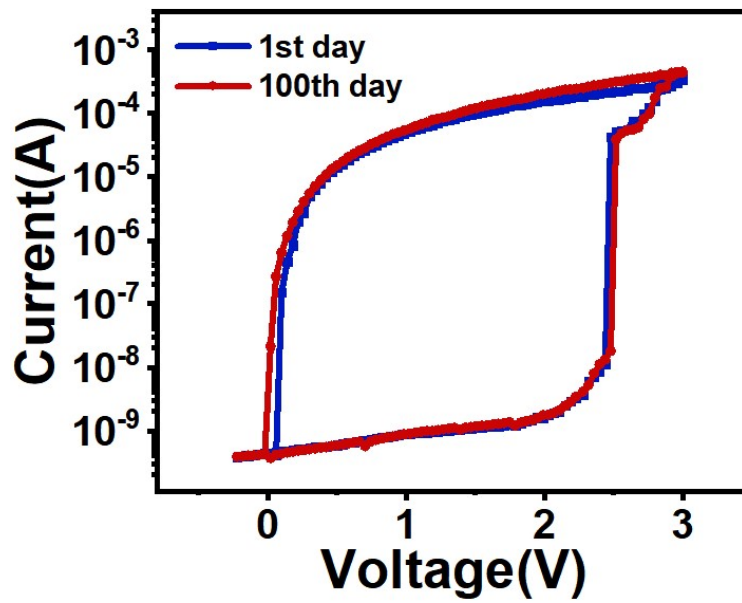

Figure S5. Threshold switching characteristics stability of the artificial neuron.

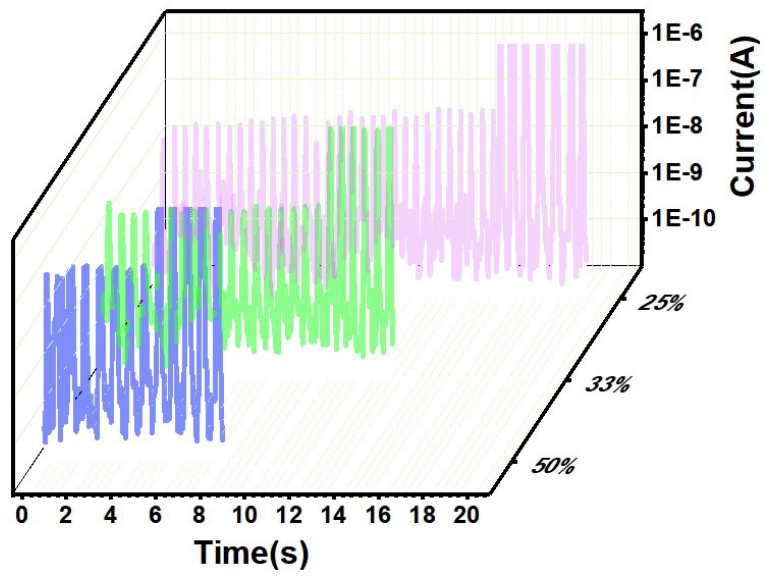

**Figure S6.** The firing time is affected by the duty ratio of stimulation pulse (50%, 33%, 25%).

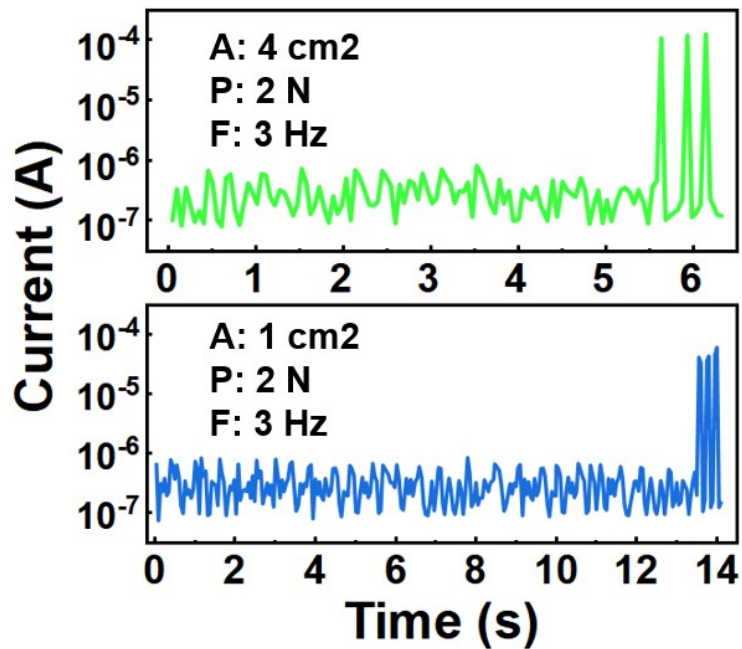

**Figure S7.** The firing time is affected by the pressure area on TENG.

**Table S1** The comparison between other strain-isolated stretchable substrates research and this work.

| Materials      | Methods                | Self-powered | Strain intensity | Ref.      |
|----------------|------------------------|--------------|------------------|-----------|
| Ecoflex/Liquid | Microfluidic space     | No           | 50%              | 1         |
| Acetate        | Rigid-soft combination | No           | 50%              | 2         |
| PI             | Cut-transfer-release   | No           | 200%             | 3         |
| PDMS           | Microislands           | No           | 45%              | 4         |
| PDMS           | 3D buckling assembling | No           | 100%             | 5         |
| Cu             | wrinkled               | No           | 40%              | 6         |
| PDMS-PMAA      | Double-network         | Yes          | 60%              | This work |

## References

- [1] Y. Ma, M. Pharr, L. Wang, J. Kim, Y. Liu, Y. Xue, R. Ning, X. Wang, H. U. Chuang, X. Feng, J. A. Rogers, Y. Huang, *Small*, **2017**, 13, 1602954.
- [2] Y. Kim, J. Yoon, J. Yin, D. Kim, S. Y. Hong, S. Lee, G. Zi, J. S. Ha, *ACS Nano*, **2014**, 8, 11639-11650.
- [3] Z. Yan, T. Pan, G. Yao, F. Liao, Z. Huang, H. Zhang, M. Gao, Y. Zhang, Y. Lin, *Sci. Rep.* **2017**, 7, 42227.
- [4] H. Li, Z. Wang, S. Lu, Y. Ma, X. Feng, *Adv. Mater, Technol.* **2018**, 1800365.
- [5] Z. Wang, H. Wang, F. Liu, Y. Kang, Y. Chen, X. Feng, *Extreme Mech. Lett.* **2022**, 56, 101841.
- [6] S. Chen, H. Liu, S. Liu, P. Wang, S. Zeng, L. Sun, L. Liu, *ACS Appli. Mater. Interfaces*, **2018**, 10, 4305-4314.
